# Supplementary material
Source: PubMed Central journal article supplement (PMC3603704)
Supplement: NIHMS439533-supplement-1.pdf [file NIHMS439533-supplement-1.pdf]

# SUPPLEMENTAL MATERIAL

| TABLE OF CONTENTS                                                                                                                                                                                               | Page(s) |
|-----------------------------------------------------------------------------------------------------------------------------------------------------------------------------------------------------------------|---------|
| <u>Supplemental Table 1.</u> Linear Regression models developed from MedPAR data for the prediction of post-procedure costs and length of stay                                                                  | 2       |
| <u>Supplemental Table 2.</u> Linear Regression models developed from MedPAR data for the prediction of post-procedure length of stay                                                                            | 3       |
| <u>Supplemental Tables 3 and 4.</u> Regression models developed from FREEDOM follow-up cost (Table 3) and utility data (Table 4) for the prediction of long-term costs and QALYs (inputs into the Markov model) | 4       |
| <u>Supplemental Table 5.</u> Lifetime Cost-Effectiveness Results for Base Case and Sensitivity Analyses in Terms of Cost per Life Year Gained                                                                   | 5       |
| <u>Supplemental Table 6.</u> Lifetime Cost-Effectiveness Results for Subgroups in Terms of Cost per Life Year Gained                                                                                            | 6       |

**Supplemental Table 1. MedPAR Model: Hospital Cost Estimates (2010 US\$)**

| <b>Model Variable</b>                                           | <b>CABG (n= 43,866)</b> | <b>PCI (n= 113,921)</b> |
|-----------------------------------------------------------------|-------------------------|-------------------------|
| Intercept* (uncomplicated hospitalization, non-procedure costs) | 16,435                  | 6,227                   |
| <b><i>Demographics</i></b>                                      |                         |                         |
| Age ≥ 80 years                                                  | 2,157                   | 167                     |
| Female                                                          | 622                     | --                      |
| <b><i>Co-morbidities</i></b>                                    |                         |                         |
| COPD                                                            | --                      | 620                     |
| Chronic renal failure, with dialysis                            | 9,659                   | 3,162                   |
| CHF                                                             | 3,189                   | 1,715                   |
| <b><i>Complications</i></b>                                     |                         |                         |
| Death                                                           | 12,400                  | 3,239                   |
| Stroke                                                          | 9,611                   | 6,588                   |
| MI                                                              | 9,344                   | 6,230                   |
| Additional CABG                                                 | --                      | 21,948                  |
| Additional PCI(                                                 | 11,057                  | 9,301                   |
| Transfusion                                                     | --                      | 3,920                   |
| Major vascular complication                                     | 8,160                   | 2,554                   |
| Postoperative hypotension                                       | --                      | 1,309                   |
| Cardiogenic shock                                               | 16,477                  | 6,965                   |
| Respiratory failure                                             | 8,933                   | 9,738                   |
| Renal failure                                                   | 9,888                   | 5,504                   |
| Postoperative infection                                         | 14,826                  | 8,960                   |
| Postoperative atrial fibrillation                               | 882                     | 2,886                   |
| Postoperative ventricular arrhythmia                            | 2,809                   | 3,152                   |
| Pacemaker insertion                                             | 10,048                  | 5,922                   |
| ICD insertion                                                   | 11,465                  | 28,069                  |
| Cardiac tamponade                                               | 6,921                   | 6,050                   |
| Pulmonary embolus                                               | 9,385                   | 9,024                   |
| Pulmonary edema                                                 | 4,192                   | 3,873                   |
| Thoracentesis                                                   | 3,757                   | 9,298                   |

\*intercepts have been adjusted to exclude the cost of otherwise uncomplicated procedures

**Supplemental Table 2. MedPAR Model: Hospital LOS Estimates**

| <b>Model Variable</b>                | <b>CABG (n= 43,866)</b> | <b>PCI (n= 113,921)</b> |
|--------------------------------------|-------------------------|-------------------------|
| Intercept                            | 6.75                    | 1.75                    |
| <b><i>Demographics</i></b>           |                         |                         |
| Age ≥ 80 years                       | 0.91                    | 0.26                    |
| Female                               | 0.77                    | --                      |
| <b><i>Co-morbidities</i></b>         |                         |                         |
| COPD                                 | --                      | 0.47                    |
| Chronic renal failure, with dialysis | 3.17                    | 1.44                    |
| CHF                                  | 1.47                    | 1.34                    |
| <b><i>Complications</i></b>          |                         |                         |
| Death                                | 0.02                    | -0.33                   |
| Stroke                               | 4.26                    | 3.07                    |
| MI                                   | 2.92                    | 2.54                    |
| Additional CABG                      | --                      | 5.25                    |
| Additional PCI                       | 1.02                    | 1.51                    |
| Transfusion                          | --                      | 2.44                    |
| Major vascular complication          | 1.70                    | 1.13                    |
| Postoperative hypotension            | --                      | 0.23                    |
| Cardiogenic shock                    | 3.18                    | 2.36                    |
| Respiratory failure                  | 2.95                    | 4.24                    |
| Renal failure                        | 4.24                    | 3.87                    |
| Postoperative infection              | 7.89                    | 5.08                    |
| Postoperative atrial fibrillation    | 0.58                    | 1.63                    |
| Postoperative ventricular arrhythmia | 1.16                    | 1.57                    |
| Pacemaker insertion                  | 1.97                    | 0.93                    |
| ICD insertion                        | 1.89                    | 2.90                    |
| Cardiac tamponade                    | 3.41                    | 1.00                    |
| Pulmonary embolus                    | 4.27                    | 4.76                    |
| Pulmonary edema                      | 0.99                    | 1.19                    |
| Thoracentesis                        | 2.46                    | 5.95                    |

**Supplemental Table 3. Linear Regression Prediction Model for Long-term Costs**

| <b>Parameter</b>                          | <b>Coefficient Estimate (\$)</b> | <b>p-value</b> |
|-------------------------------------------|----------------------------------|----------------|
| Intercept                                 | 4,787                            | 0.0009         |
| CABG                                      | -1,672                           | <0.0001        |
| Age (years)                               | 18                               | 0.40           |
| Female                                    | 1,068                            | 0.0102         |
| 3 vessel disease                          | 1,353                            | 0.0058         |
| History of cerebrovascular disease        | 4,491                            | 0.0003         |
| History of peripheral artery disease      | 1,894                            | 0.0041         |
| MI during trial                           | 3,526                            | 0.0001         |
| Stroke during trial but > 1 yr previously | 4,810                            | 0.05           |
| Stroke within the past year*              | 16,575                           | <0.0001        |

\*this coefficient was eliminated in the patient-level prediction of annual long-term costs, which includes only the long term impact of stroke events that occurred during the course of the trial

**Supplemental Table 4. Linear Regression Prediction Model for Follow-up Utility Weights**

| <b>Parameter</b>                          | <b>Coefficient Estimate</b> | <b>p-value</b> |
|-------------------------------------------|-----------------------------|----------------|
| Intercept                                 | 0.9312                      | <0.0001        |
| Age (years)                               | -0.00028                    | 0.22           |
| Female                                    | -0.0625                     | <0.0001        |
| History of MI                             | -0.0205                     | <0.0001        |
| History of Stroke                         | -0.0226                     | 0.066          |
| History of Cerebrovascular Disease        | -0.0618                     | <0.0001        |
| History of Peripheral Artery Disease      | -0.0304                     | <0.0001        |
| MI during trial                           | -0.0419                     | <0.0001        |
| Stroke during trial but > 1 yr previously | -0.0663                     | 0.014          |
| Stroke within the past year*              | -0.1033                     | <0.0001        |

\*this coefficient was eliminated in the patient-level prediction of long-term utility, which includes only the long term impact of stroke events that occurred during the course of the trial

**Supplemental Table 5. Lifetime Cost-Effectiveness Results for Base Case and Sensitivity Analyses in Terms of Cost per Life Year Gained**

|                                            |                                                   | Cost (\$) with CABG | Cost (\$) with PCI | $\Delta_{C-P}$ Cost (\$) (95% CI) | Life Years with CABG | Life Years with PCI | Life Years Gained with CABG (95% CI) | ICER: Cost (\$) per Life Year gained | % Dominant | % Dominated | % < \$50K |
|--------------------------------------------|---------------------------------------------------|---------------------|--------------------|-----------------------------------|----------------------|---------------------|--------------------------------------|--------------------------------------|------------|-------------|-----------|
| Tapered CABG Effect Between 5 and 10 Years | Base Case: Lifetime – ITT                         | 114,571             | 109,179            | 5,392 (399, 10,320)               | 12.177               | 11.383              | 0.794 (0.243, 1.323)                 | 6,791                                | 1.5        | 0.2         | 99.7      |
|                                            | Lifetime – Per Protocol                           | 114,855             | 108,878            | 5,976 (1,207, 10,925)             | 12.202               | 11.351              | 0.851 (0.284, 1.432)                 | 7,022                                | 0.7        | 0.0         | 99.6      |
|                                            | 10 year analysis – ITT                            | 81,710              | 80,295             | 1,416 (-2,061, 5,017)             | 7.626                | 7.339               | 0.287 (0.015, 0.550)                 | 4,934                                | 23.4       | 0.7         | 97.3      |
|                                            | Lifetime - ITT, no CABG effect on long term costs | 121,244             | 109,179            | 12,045 (6,933, 17,103)            | 12.177               | 11.383              | 0.794 (0.243, 1.323)                 | 15,170                               | 0.0        | 0.3         | 98.6      |
| Fixed CABG Effect Between 5 and 10 Years   | Lifetime analysis                                 | 116,147             | 109,179            | 6,968 (1,273, 12,327)             | 12.406               | 11.383              | 1.023 (0.352, 1.660)                 | 6,811                                | 0.7        | 0.2         | 99.8      |
|                                            | 10 year analysis                                  | 81,846              | 80,295             | 1,551 (-1,822, 5,292)             | 7.648                | 7.339               | 0.309 (0.037, 0.619)                 | 5,019                                | 18.9       | 0.3         | 98.5      |
| No Effect of CABG after 5 Years            | Lifetime analysis                                 | 118,664             | 109,179            | 9,485 (4,905, 13,995)             | 11.822               | 11.383              | 0.439 (0.012, 0.859)                 | 21,606                               | 0.0        | 2.3         | 91.4      |
|                                            | 10 year analysis                                  | 87,155              | 80,295             | 6,861 (3,408, 10,230)             | 7.463                | 7.339               | 0.124 (-0.073, 0.308)                | 55,331                               | 0.0        | 9.6         | 42.5      |

**Supplemental Table 6. Lifetime Cost-Effectiveness Results for Subgroups in Terms of Cost per Life Year Gained**

|                                                  | Cost (\$) with CABG             | Cost (\$) with PCI | $\Delta_{C-P}$ Cost (\$) (95% CI) | Life Years with CABG     | Life Years with PCI | Life Years Gained with CABG (95%CI) | ICER: Cost (\$) per Life Year Gained | % Dominant | % Dominated | % < \$50K |      |
|--------------------------------------------------|---------------------------------|--------------------|-----------------------------------|--------------------------|---------------------|-------------------------------------|--------------------------------------|------------|-------------|-----------|------|
| SUBGROUP ANALYSES BASED ON BASE CASE ASSUMPTIONS | SYNTAX Score <23 (n=657)        | 113,201            | 104,417                           | 8,784 (753, 16,272)      | 12.429              | 11.939                              | 0.491 (-0.526, 1.394)                | 17,890     | 0.3         | 13.3      | 77.9 |
|                                                  | SYNTAX Score 23-32 (n=828)      | 115,602            | 111,441                           | 4,160 (-3,670, 11,619)   | 12.221              | 11.113                              | 1.107 (0.266, 1.893)                 | 3,758      | 13.6        | 0.1       | 99.2 |
|                                                  | SYNTAX Score >32 (n=359)        | 114,220            | 113,247                           | 973 (-10,177, 11,337)    | 11.663              | 11.095                              | 0.568 (-0.713, 1.743)                | 1,713      | 29.5        | 3.0       | 83.5 |
|                                                  | Male (n=1328)                   | 107,527            | 104,468                           | 3,059 (-2,304, 8,406)    | 12.124              | 11.243                              | 0.882 (0.241, 1.515)                 | 3,468      | 10.3        | 0.0       | 99.9 |
|                                                  | Female (n=527)                  | 131,295            | 122,046                           | 9,249 (-729, 18,900)     | 12.383              | 11.766                              | 0.618 (-0.621, 1.705)                | 14,966     | 0.6         | 10.8      | 79.3 |
|                                                  | Age <60 (n=624)                 | 136,342            | 125,152                           | 11,190 (3,656, 18,572)   | 15.850              | 14.419                              | 1.431 (0.745, 2.205)                 | 7,820      | 0.3         | 0.0       | 100  |
|                                                  | Age 60-69 (n=621)               | 106,301            | 108,066                           | -1,765 (-9,533, 5,504)   | 11.319              | 11.003                              | 0.316 (-0.567, 1.070)                |            | 44.7        | 0.6       | 79.8 |
|                                                  | Age ≥70 (n=610)                 | 93,926             | 87,034                            | 6,892 (-3,018, 15,804)   | 7.899               | 7.464                               | 0.435 (-0.687, 1.306)                | 15,844     | 2.2         | 15.3      | 72.6 |
|                                                  | LAD (n=1695)                    | 115,124            | 109,463                           | 5,661 (505, 10,981)      | 12.229              | 11.363                              | 0.866 (0.280, 1.436)                 | 6,537      | 1.7         | 0.1       | 99.6 |
|                                                  | No LAD (n=150)                  | 105,875            | 108,189                           | -2,314 (-52,357, 10,225) | 11.562              | 11.723                              | -0.161 (-8.027, 1.420)               |            | 16.7        | 8.0       | 42.6 |
|                                                  | 2 vessel disease (n=310)        | 103,264            | 92,313                            | 10,950 (-2,486, 21,181)  | 12.580              | 11.712                              | 0.867 (-1.516, 2.075)                | 12,630     | 0.5         | 10.1      | 82.0 |
|                                                  | 3+ vessel disease (n=1534)      | 116,891            | 112,830                           | 4,061 (-1,367, 9,483)    | 12.142              | 11.312                              | 0.830 (0.233, 1.438)                 | 4,893      | 6.6         | 0.1       | 99.9 |
|                                                  | HgbA <sub>1c</sub> < 7 (n=617)  | 103,579            | 103,852                           | -273 (-6,879, 7,142)     | 11.610              | 11.263                              | 0.347 (-0.609, 1.247)                |            | 33.9        | 2.1       | 78.4 |
|                                                  | HgbA <sub>1c</sub> ≥ 7 (n=1096) | 120,399            | 111,893                           | 8,507 (1,618, 15,266)    | 12.605              | 11.480                              | 1.126 (0.381, 1.827)                 | 7,555      | 0.5         | 0.3       | 99.5 |
|                                                  | US (n=351)                      | 126,113            | 121,412                           | 4,701 (-7,997, 17,253)   | 12.379              | 11.039                              | 1.339 (0.176, 2.353)                 | 3,511      | 22.1        | 0.3       | 99.0 |
| Non-US (n=1504)                                  | 111,978                         | 106,356            | 5,622 (506, 10,653)               | 12.151                   | 11.462              | 0.689 (0.025, 1.348)                | 8,160                                | 1.0        | 1.6         | 97.4      |      |
